# Supplementary material for: Tough, stable and self-healing luminescent perovskite-polymer matrix applicable to all harsh aquatic environments
Source: PubMed Central journal article supplement (PMC8921293; doi:10.1038/s41467-022-29084-z), 2022-03-14
Supplement: 41467_2022_29084_MOESM1_ESM.pdf [file 41467_2022_29084_MOESM1_ESM.pdf]

## Supplementary Information

### **Tough, stable and self-healing luminescent perovskite-polymer matrix applicable to all harsh aquatic environments**

*Yuncong Liu,<sup>1,†</sup> Tao Chen,<sup>1,†</sup> Zhekai Jin,<sup>1</sup> Mengxue Li,<sup>1</sup> Dongdong Zhang,<sup>1</sup> Lian Duan,<sup>1</sup> Zhiguo Zhao<sup>2</sup>, Chao Wang<sup>1,\*</sup>*

<sup>1</sup>Key Lab of Organic Optoelectronics & Molecular Engineering, Department of Chemistry, Tsinghua University, Beijing 100084, PR China

<sup>2</sup>China Huaneng Clean Energy Research Institute, Beijing 102218, PR China

\*Corresponding author. E-mail address: chaowangthu@mail.tsinghua.edu.cn

<sup>†</sup>These authors contributed equally.

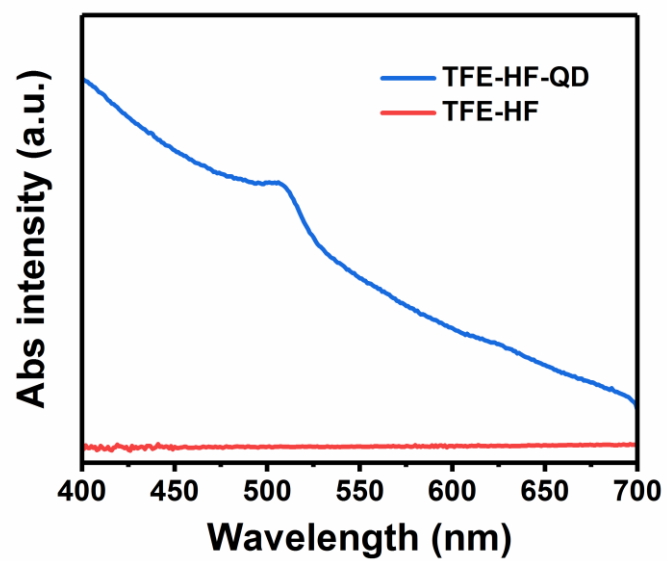

**Supplementary Figure 1. UV-Vis absorption spectrum of TFE-HF<sub>1.0</sub> and TFE-HF-QD<sub>1.0</sub> film.**

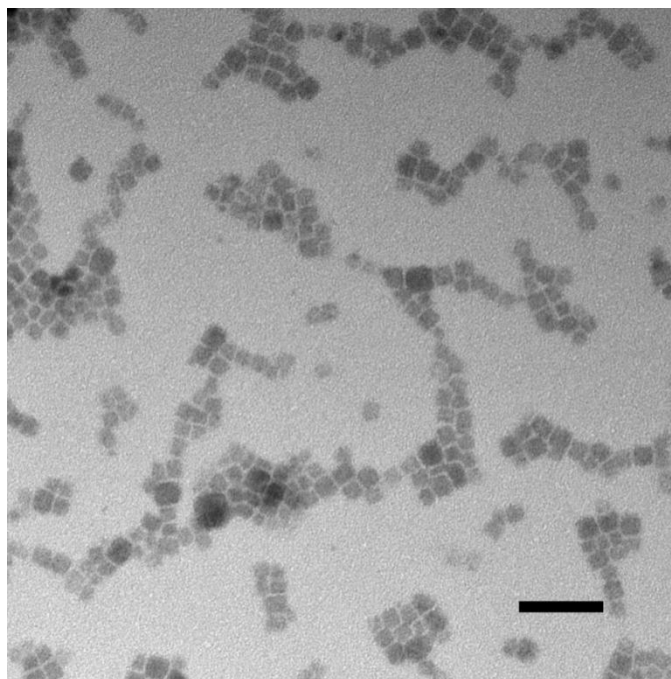

**Supplementary Figure 2. TEM image of the synthesized CsPbBr<sub>3</sub>. Scale bar, 50 nm.**

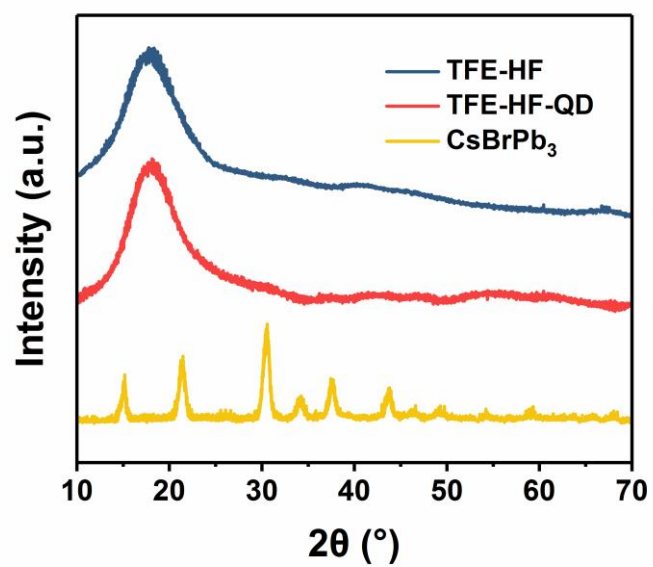

**Supplementary Figure 3. The XRD patterns of CsPbBr<sub>3</sub>, TFE-HF film and TFE-HF-QD film.**

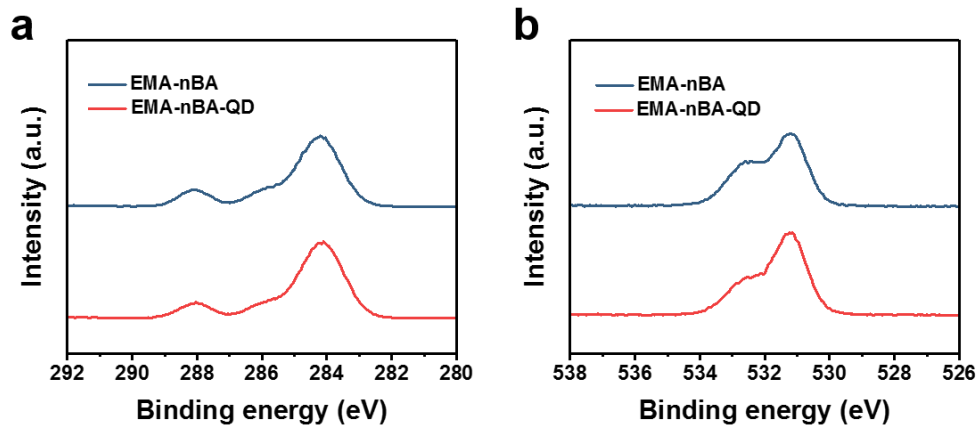

**Supplementary Figure 4. XPS spectra of (a) C 1s and (b) O 1s region of EMA-nBA and EMA-nBA-QD.**

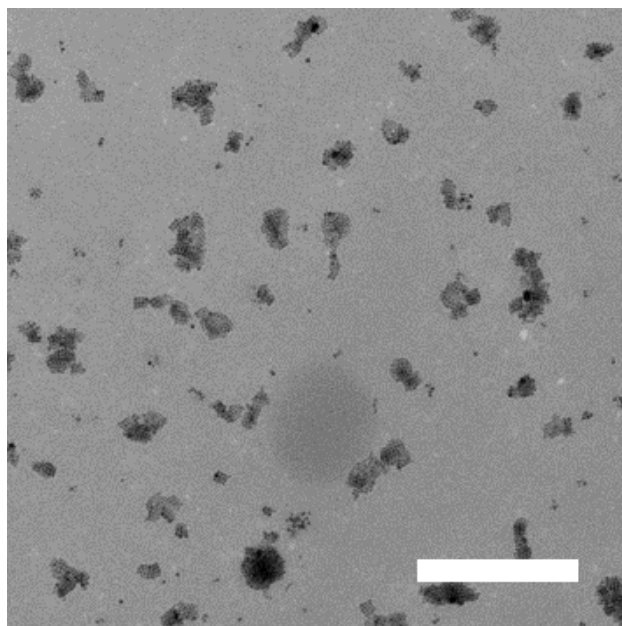

**Supplementary Figure 5. A typical TEM image of EMA-nBA-QD. Scale bar, 0.5  $\mu\text{m}$ .**

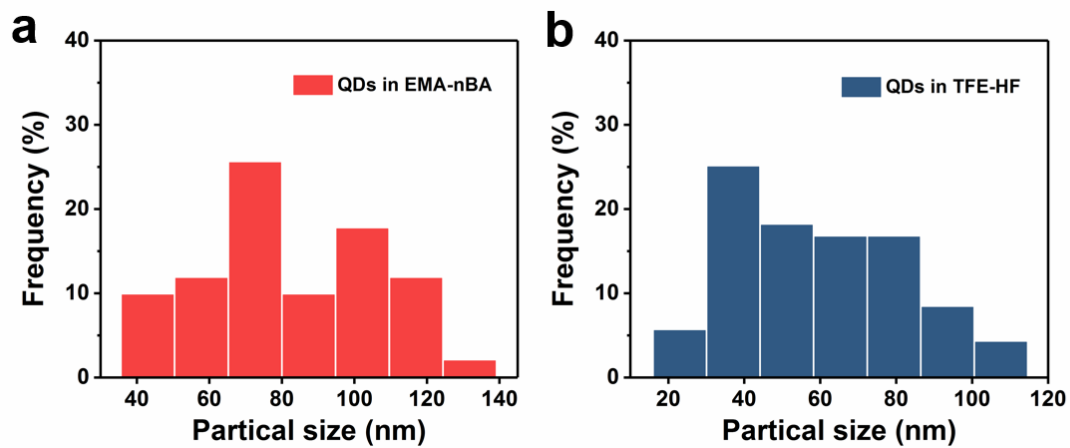

**Supplementary Figure 6. Statistical diagram of particle size distribution in different polymers.**

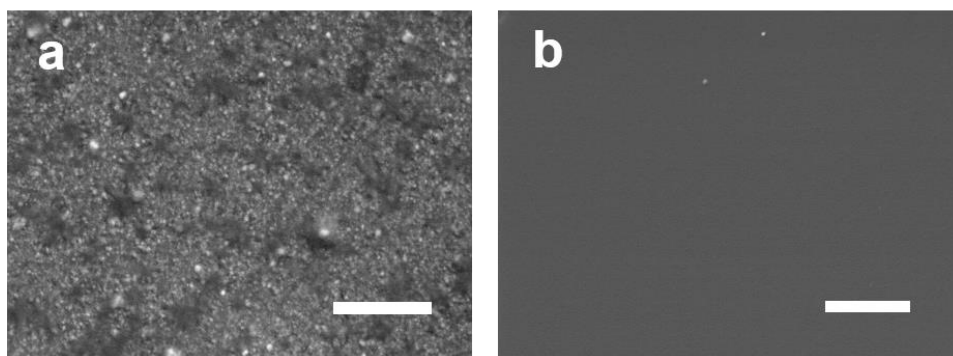

**Supplementary Figure 7. SEM images of (a) CsPbBr<sub>3</sub> QDs and (b) TFE-HF-QD film.**  
Scale bar, 50  $\mu\text{m}$ .



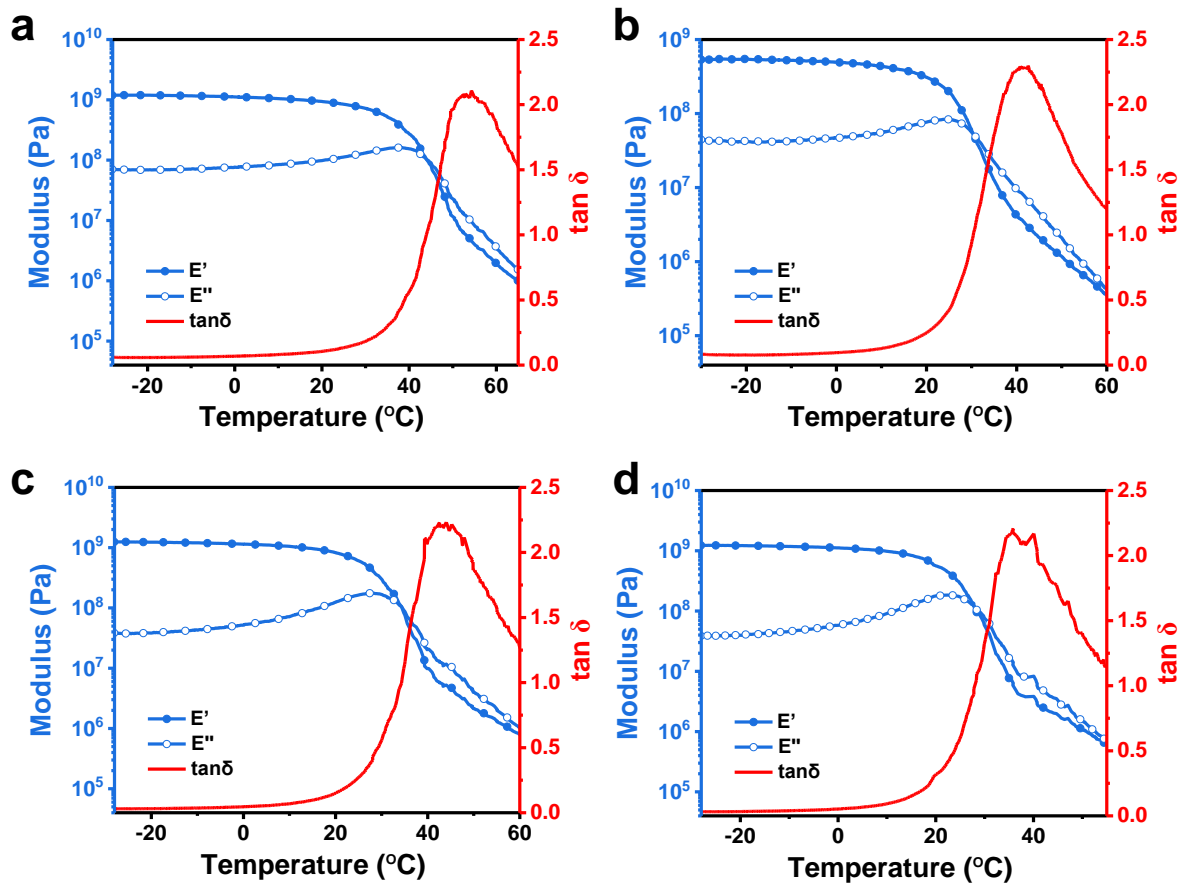

**Supplementary Figure 8. DMA results.** The storage modulus ( $G'$ ), loss modulus ( $G''$ ) and  $\tan \delta$  of (a) TFE-HF-QD<sub>1.2</sub>; (b) TFE-HF-QD<sub>1.0</sub>; (c) TFE-HF-QD<sub>0.8</sub> and (d) TFE-HF-QD<sub>0.6</sub>.

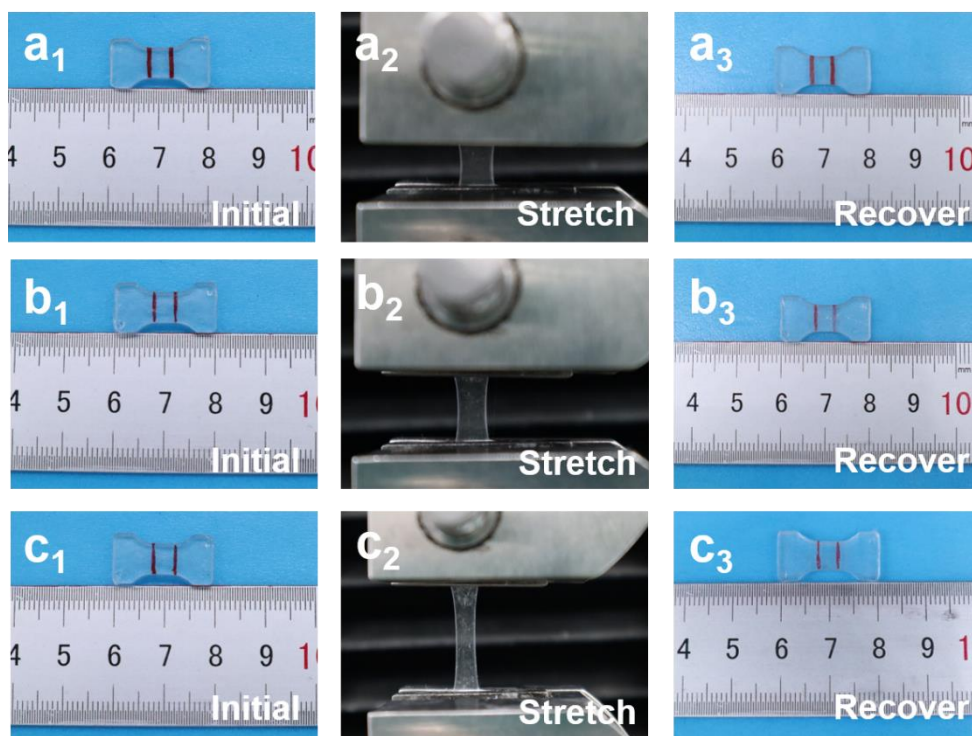

**Supplementary Figure 9. Photos of stretching process.** Photos of TFE-HF-QD<sub>1.0</sub> samples at initial state, stretched state and recovered after stretched to (a<sub>1</sub>-a<sub>3</sub>) 300%, (b<sub>1</sub>-b<sub>3</sub>) 500% and (c<sub>1</sub>-c<sub>3</sub>) 1000%.

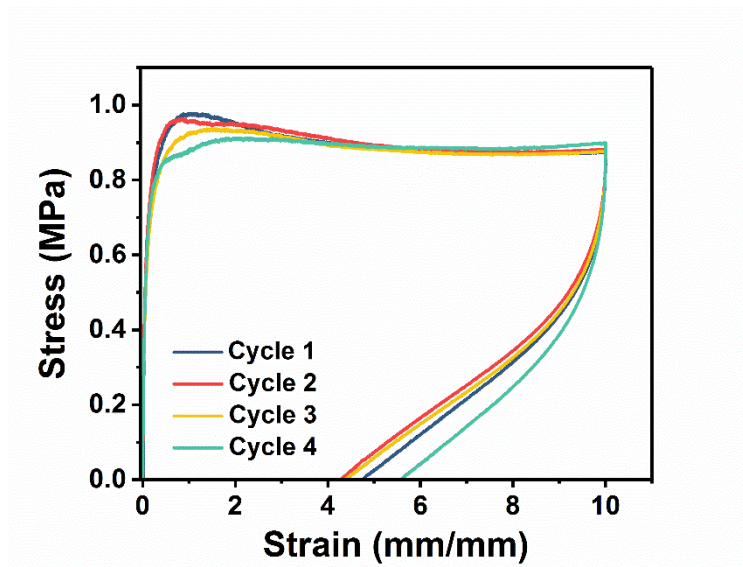

**Supplementary Figure 10. Cyclic loading and recovery test.** Cyclic loading and recovery of TFE-HF-QD<sub>1.0</sub> stretched to 10 times.

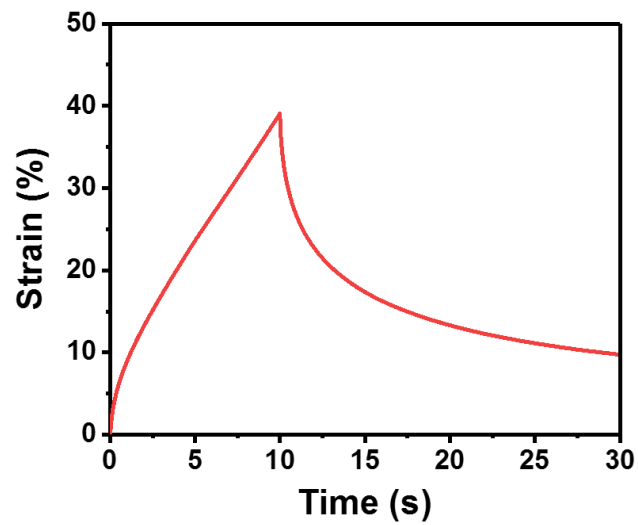

**Supplementary Figure 11. Mechanical creep test of TFE-HF-QD<sub>1.0</sub>.** Rectangular samples (length: 16 mm; width: 6 mm; thickness: 2 mm) was used. Dead loads were used to apply constant engineering stresses of 0.3 MPa.

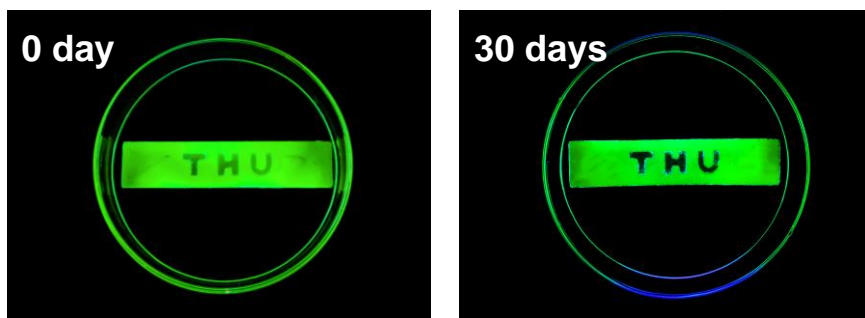

**Supplementary Figure 12. Stability underwater.** The photos of TFE-HF-QD<sub>1.0</sub> samples before and after immersed in water for a month.

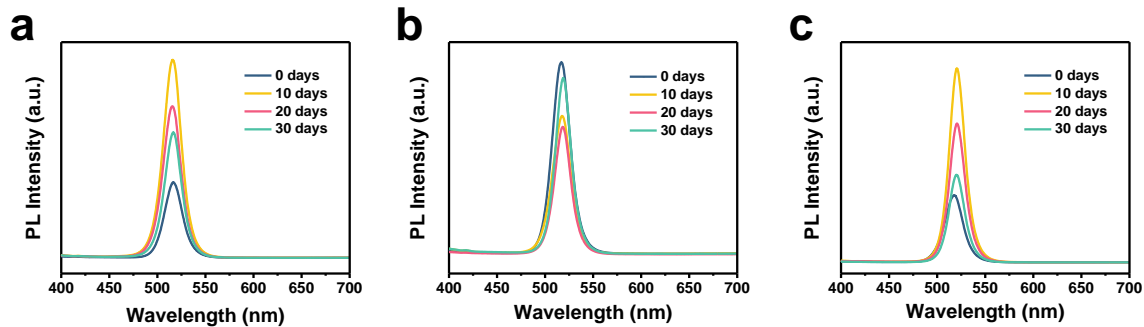

**Supplementary Figure 13. PL intensity of TFE-HF-QD<sub>1.0</sub> after immersed in different aqueous environments. (a) In acid (pH=1); (b) In base (pH=13); (c) In salty water.**

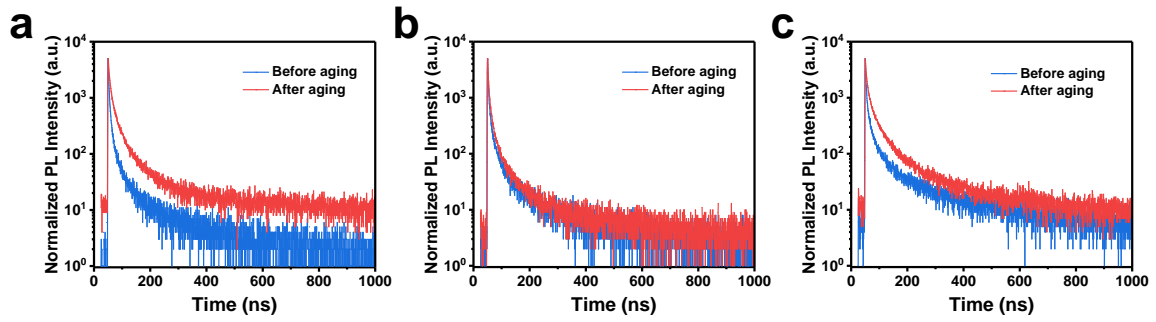

**Supplementary Figure 14. PL decay dynamics of TFE-HF-QD<sub>1.0</sub> before and after aging in different conditions.** (a) In acid solution (pH=1); (b) In base solution (pH=13); (c) In salty water.

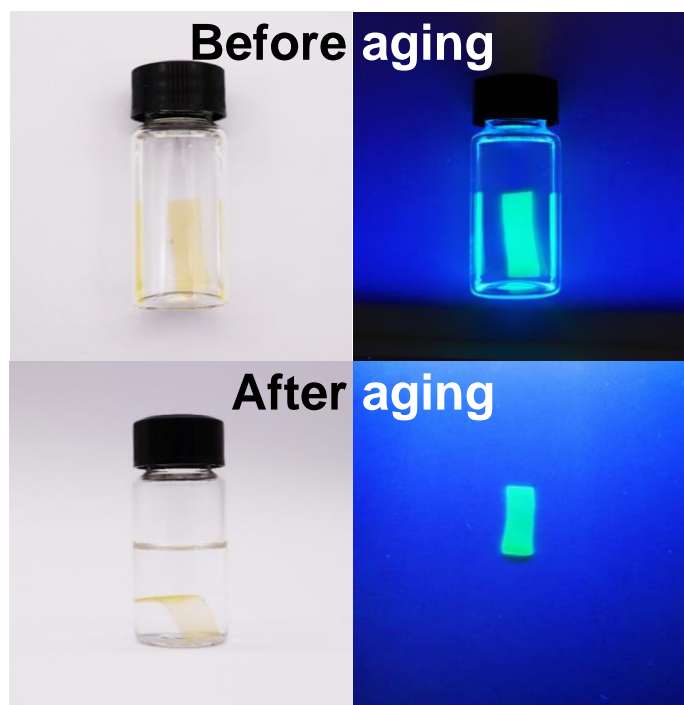

**Supplementary Figure 15. The photos of TFE-HF-QD<sub>1.0</sub> samples before and after immersed in hexane for two weeks.**



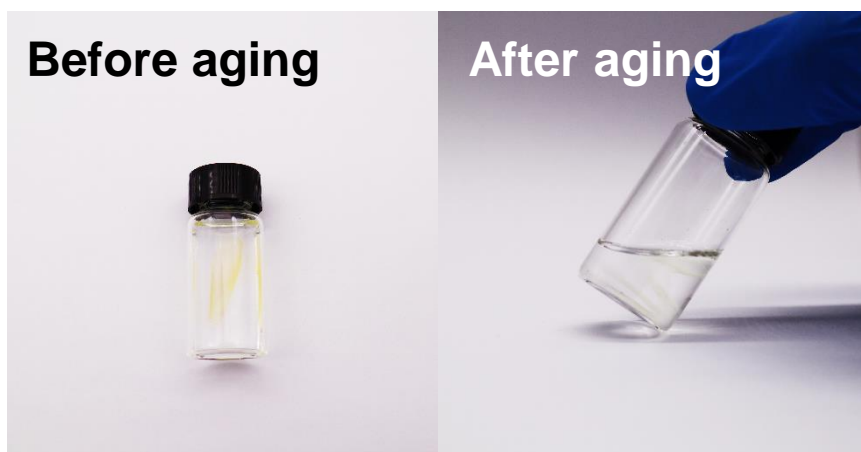

**Supplementary Figure 16. The photos of SEBS-perovskite composite samples before and after immersed in hexane for two weeks.**

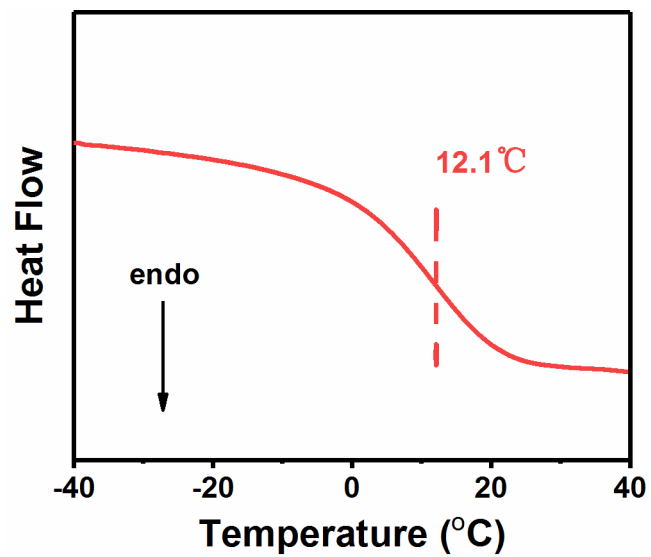

Supplementary Figure 17. DSC curve of TFE-HF-QD<sub>1.0</sub>.

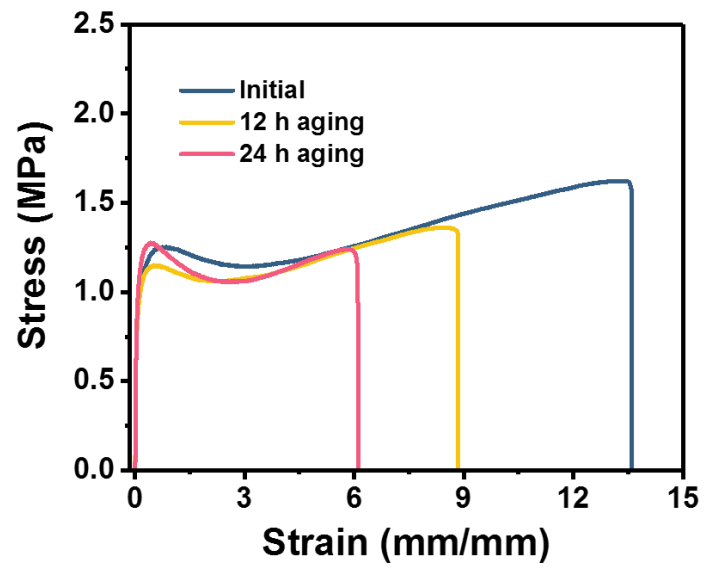

Supplementary Figure 18. Self-healing test for 12 h and 24 h aging samples.

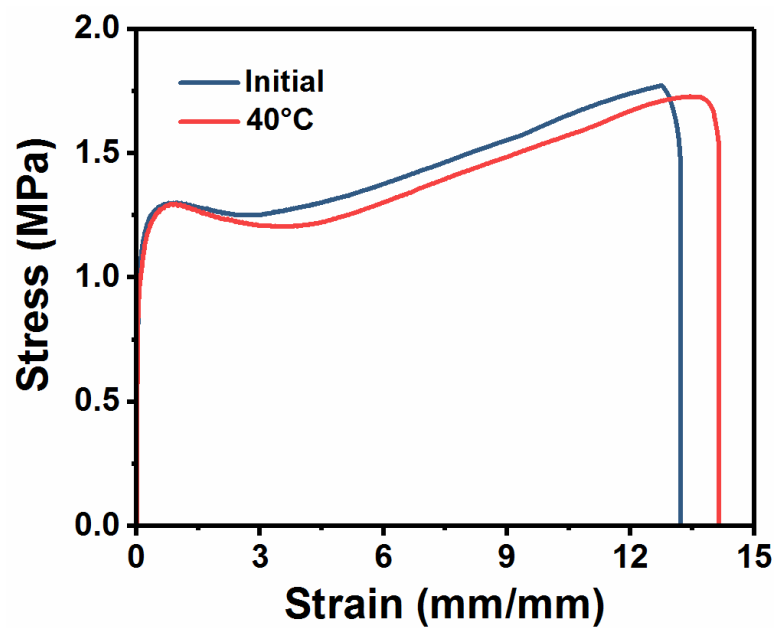

Supplementary Figure 19. Stress-strain curve of TFE-HF-QD<sub>1.0</sub> self-heal at 40°C for 24 h.

## Supplementary Tables

**Supplementary Table 1. Molecular weight information of different molar ratio polymers.**

| <b>Sample</b>         | <b>M<sub>n</sub> (Da)</b> | <b>M<sub>w</sub> (Da)</b> | <b>PDI</b> |
|-----------------------|---------------------------|---------------------------|------------|
| TFE-HF <sub>1.2</sub> | 49142                     | 91904                     | 1.870      |
| TFE-HF <sub>1.0</sub> | 75100                     | 131129                    | 1.746      |
| TFE-HF <sub>0.8</sub> | 61290                     | 122794                    | 2.003      |
| TFE-HF <sub>0.6</sub> | 60450                     | 74868                     | 1.238      |

**Supplementary Table 2. The absolute PLQY values.** PLQY of TFE-HF-QD film after different aging process.

| <b>Condition</b>             | <b>6 d</b> | <b>12 d</b> | <b>18 d</b> | <b>24 d</b> | <b>30 d</b> |
|------------------------------|------------|-------------|-------------|-------------|-------------|
| <b>TFE-HF-QD-Water</b>       | 49.92      | 29.53       | 27.42       | 26.27       | 24.16       |
| <b>TFE-HF-QD-Acid</b>        | 39.07      | 28.25       | 29.80       | 26.71       | 22.74       |
| <b>TFE-HF-QD-Base</b>        | 31.65      | 34.43       | 26.93       | 27.49       | 29.15       |
| <b>TFE-HF-QD-Salty water</b> | 44.77      | 41.49       | 30.57       | 30.03       | 33.30       |

**Supplementary Table 3. Summary of PL lifetime before and after aging in different aqueous environments.**

| <b>Conditions</b>    | <b><math>\tau_1</math> [ns]</b> | <b><math>\tau_2</math> [ns]</b> | <b><math>\tau_3</math> [ns]</b> | <b>Lifetime [ns]</b> |
|----------------------|---------------------------------|---------------------------------|---------------------------------|----------------------|
| Before aging         | 1.67                            | 9.62                            | 88.02                           | 20.59                |
| Aging in water       | 4.69                            | 25.07                           | 142.16                          | 43.19                |
| Aging in acid        | 5.09                            | 24.25                           | 118.85                          | 40.17                |
| Aging in base        | 2.77                            | 15.88                           | 111.87                          | 31.87                |
| Aging in salty water | 4.95                            | 29.86                           | 134.45                          | 54.06                |
