# Supplementary material for: Tough, stable and self-healing luminescent perovskite-polymer matrix applicable to all harsh aquatic environments
Source: PubMed Central journal article supplement (PMC8921293; doi:10.1038/s41467-022-29084-z), 2022-03-14
Supplement: 41467_2022_29084_MOESM2_ESM.pdf [file 41467_2022_29084_MOESM2_ESM.pdf]

## **Description of Additional Supplementary Files**

**File Name:** Supplementary Movie 1

**Description:** Stretching process of TFE-HF-QD1.0 at a stretching speed of 40 mm min<sup>-1</sup> under UV light.

**File Name:** Supplementary Movie 2

**Description:** A luminescent cotton fabric under deformation.

**File Name:** Supplementary Movie 3

**Description:** A luminescent cotton fabric in water environment.
